# Supplementary material for: EGO INVOLVEMENT: A THEORETICAL AND METHODOLOGICAL ALTERNATIVE.
Source: Royal Society of Chemistry journal article supplement (doi:10.1039/d4cb00038b), 1975-01-01
Supplement: d4cb00038b1.pdf [file d4cb00038b1.pdf]

## ***Supporting Information***

### **Prevention of amyloid $\beta$ fibrils deposition on the synaptic membrane in the precuneus by ganglioside nanocluster-targeting inhibitors**

Erika Miyamoto, Hideki Hayashi, Shigeo Murayama, Katsuhiko Yanagisawa, Toshinori Sato, \* and Teruhiko Matsubara\*

\* To whom correspondence should be addressed: E-mail: matsubara@bio.keio.ac.jp;  
sato@bio.keio.ac.jp

### **Contents**

|                  |                                                                                                                                         |           |
|------------------|-----------------------------------------------------------------------------------------------------------------------------------------|-----------|
| <b>Table S1</b>  | <b>Synthetic peptide amides used in this study .....</b>                                                                                | <b>S2</b> |
| <b>Figure S1</b> | <b>Detection of GD1 and GT1 in SPM lipids by MALDI-TOF/MS .....</b>                                                                     | <b>S2</b> |
| <b>Figure S2</b> | <b>Distribution of A<math>\beta</math><sub>42</sub> fibril lengths on the lipid membrane after 15 min and 24 h of interaction .....</b> | <b>S3</b> |
| <b>Figure S3</b> | <b>Preparation of the A<math>\beta</math><sub>42</sub>-accumulated lipid monolayer on a SPR sensor chip .....</b>                       | <b>S4</b> |

**Table S1 Synthetic peptide amides used in this study.**

| Code             | Protein Line Notation <sup>a)</sup>         | Structure (disulfide) |
|------------------|---------------------------------------------|-----------------------|
| GCBP             | H-VWRL LAPPSNRLLP(bK)-NH <sub>2</sub>       | linear                |
| cy5A             | H-VWRLC(1)APPFC(1)NRLLP(bK)-NH <sub>2</sub> | cyclic (5, 10)        |
| cpVIII (control) | H-AETVESCLAKPHTEN(bK)-NH <sub>2</sub>       | linear                |

a) bK = Lys(biotin)

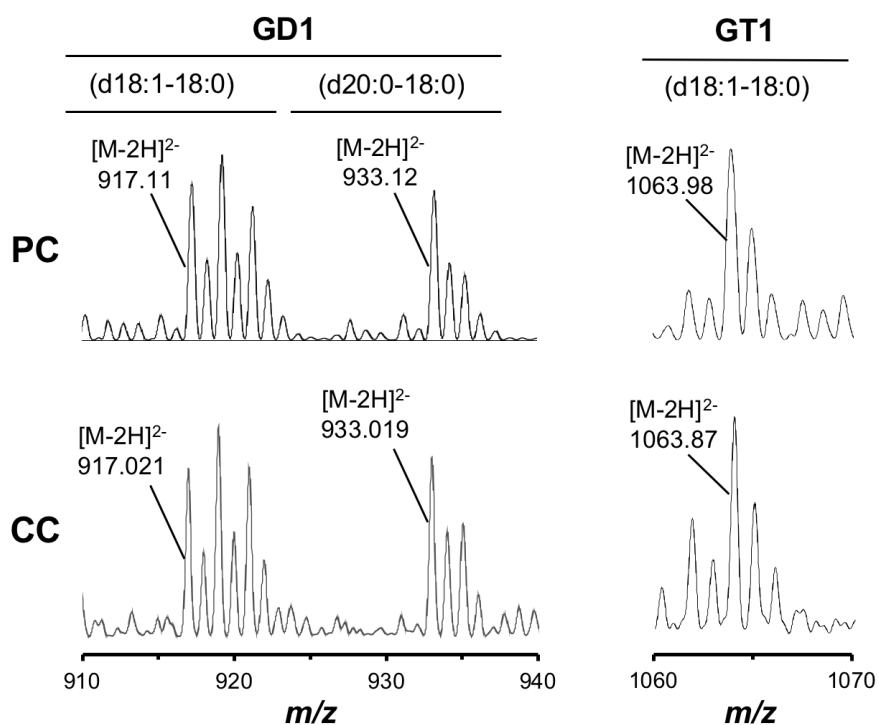

**Figure S1 Detection of GD1 and GT1 in SPM lipids by MALDI-TOF/MS.** GD1 (d18:1–18:0 and d20:0–18:0) and GT1 (d18:1–18:0) were detected from the SPM lipids of the PC and CC. GD1, GD1a and/or GD1b; GT1, GT1a and/or GT1b.

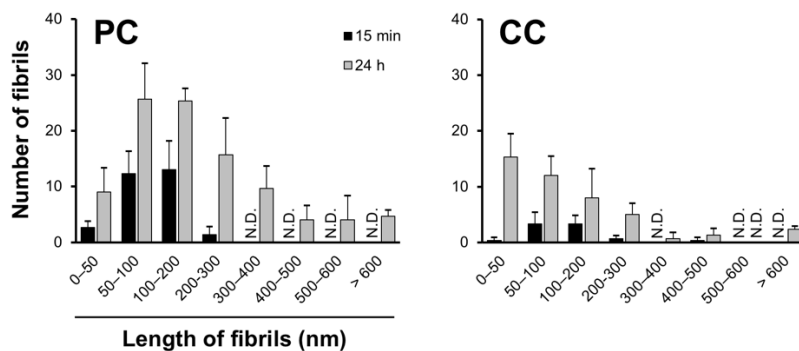

**Figure S2 Distribution of A $\beta$ <sub>42</sub> fibril lengths on the lipid membrane after 15 min and 24 h of interaction.**

Seed-free A $\beta$ <sub>42</sub> was interacted with the reconstituted lipid bilayer at 20  $\mu$ M and 4  $\mu$ M for 15 min and 24 h. The surface topography of the membrane was observed by AFM and the number and length of A $\beta$ <sub>42</sub> fibrils were measured using ImageJ. Data are presented as average values  $\pm$  standard deviation (n = 3). N.D., not detected.

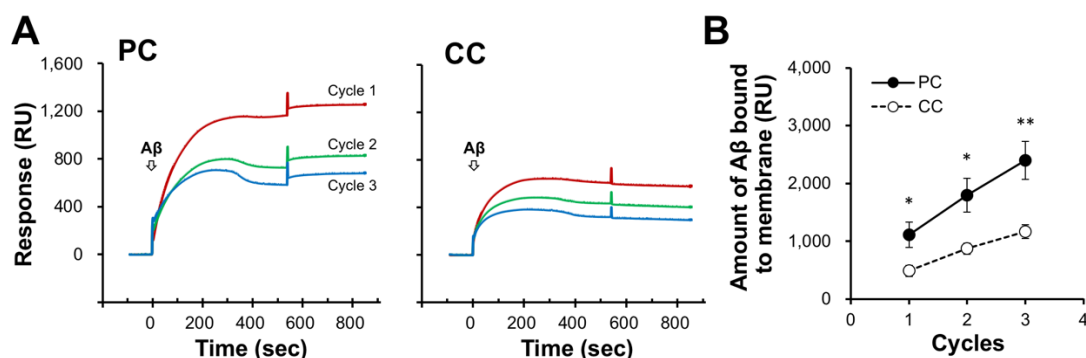

**Figure S3 Preparation of the Aβ<sub>42</sub>-accumulated lipid monolayer on a SPR sensor chip.**

(A) Typical SPR sensorgram of the Aβ<sub>42</sub> (20 μM) interaction with the reconstituted SPM lipid monolayer. The set of the sensorgrams for the association phase (540 s) and the dissociation phase (300 s) is indicated (cycle). The Aβ<sub>42</sub> interaction was repeated three times to prepare the Aβ<sub>42</sub>-accumulated lipid monolayer.

(B) Amount of Aβ<sub>42</sub> accumulated on the lipid membrane. The response value (RU) at 840 s of each cycle was obtained and the accumulated response (accumulated amount) was plotted against the number of cycles. The amount of Aβ<sub>42</sub> bound to the PC membrane was significantly greater than that bound to the CC membrane. \* $p < 0.05$ , \*\* $p < 0.01$  compared with CC. Data are presented as average values  $\pm$  standard deviation ( $n = 3$ ).
